# Supplementary material for: Critical roles of the lncRNA CASC11 in tumor progression and cancer metastasis: The biomarker and therapeutic target potential
Source: PubMed Central journal article supplement — Genes Dis. 2020 Dec 2;9(2):325–33. doi: 10.1016/j.gendis.2020.11.016 (PMC8843879; doi:10.1016/j.gendis.2020.11.016), 2020-12-02

# Freescience Editorial Team

## Certificate of English Editing

### Paper Title

Critical roles of the lncRNA CASC11 in tumor progression and cancer metastasis: The biomarker and therapeutic target potential

### Authors

Bei Wang , Wen Xu , Chengyu Hu , Kai Liu , Jinlan Chen, Chong Guo<sup>1</sup> and Chengfu Yuan.

This certificate is issued as a confirmation that the paper mentioned above has been proofread and edited for language clarity and grammar by professional editors of our company.

We guarantee that the original message was not distorted, and that the paper is understandable and free of errors assuming that the changes and suggestions given are accepted, and text is not altered without our knowledge

Date of Editing: 10-30-2020

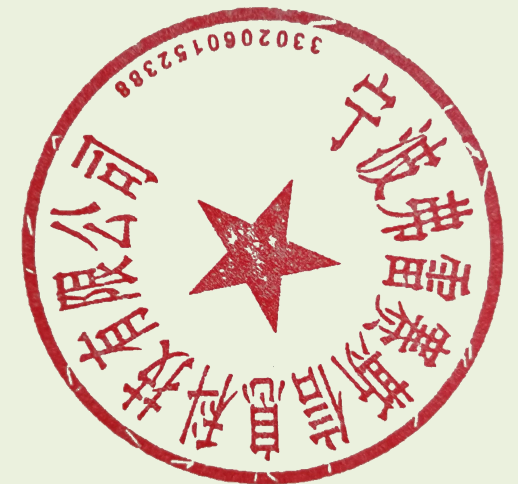

Supplement: mmc1.pdf [file mmc1.pdf]
